# Supplementary material for: NCR3 polymorphism, haematological parameters, and severe malaria in Senegalese patients
Source: PeerJ. 2018 Dec 3;6:e6048. doi: 10.7717/peerj.6048 (PMC6282937; doi:10.7717/peerj.6048)
Supplement: Data S1 — Gender, age, ethnic group, clinical malaria phenotype, survival, NCR3 and HBB genotypes are stated for each individual. [file peerj-06-6048-s001.xlsx]

## Sheet: Feuil1
Patient	Gender	Age (year)	Ethnic group	Phenotype	Survival	rs33930165	rs334	rs2736191
1	M	14	Diola	CM	alive	GG	AA	GG
2	M	18	Sérrère	CM	dead	GG	AT	GG
3	M	40	Sérrère	CM	dead	GG	AA	GG
4	M	18	Wolof	CM	dead	GG	AA	GC
5	M	50	Wolof	CM	dead	GG	AA	GG
6	M	55	Wolof	CM	alive	GG	AA	GG
7	M	27	Peulh	CM	alive	GG	AA	GC
8	M	20	Diola	CM	alive	GG	AA	GG
9	M	28	Peulh	CM	alive	GG	AA	GG
10	M	33	Peulh	CM	alive	GG	AA	GG
11	M	16	Wolof	CM	alive	GG	AA	GG
12	M	25	Wolof	CM	dead	GG	AA	CC
13	M	70	Wolof	CM	alive	GG	AA	GC
14	M	18	Socé	CM	alive	GG	AA	GG
15	M	20	Peulh	CM	alive	GG	AA	GG
16	M	53	Peulh	CM	dead	GG	AA	GC
17	M	12	NA	CM	dead	GG	AA	GG
18	F	50	NA	CM	alive	GG	AA	GG
19	M	50	NA	CM	alive	GG	AA	NA
20	F	52	NA	CM	dead	GG	AA	NA
21	M	54	Peulh	CM	alive	GG	AA	GC
22	M	44	Peulh	CM	alive	GG	AA	CC
23	F	34	Sérrère	CM	alive	GG	AA	CC
24	M	22	Diola	CM	dead	GG	AA	GG
25	M	26	Wolof	CM	dead	GG	AA	GG
26	M	22	Wolof	CM	alive	GG	AA	GG
27	F	25	Wolof	CM	alive	GG	AA	GC
28	M	21	Bambara	CM	alive	GG	AA	GC
29	M	71	Bambara	CM	alive	GG	AA	GG
30	M	61	Wolof	CM	alive	GG	AA	GG
31	F	79	Sérrère	CM	alive	GG	AA	GG
32	M	15	Wolof	CM	dead	GG	AA	GC
33	M	31	Wolof	CM	alive	GG	AA	GG
34	M	32	Wolof	CM	alive	GG	AA	GG
35	M	56	Wolof	CM	alive	GG	AA	GG
36	F	59	Bambara	CM	alive	GG	AA	GG
37	M	20	Wolof	CM	alive	GG	AA	GG
38	F	17	Wolof	CM	alive	GG	AA	GG
39	F	20	Bambara	CM	alive	GG	AA	GG
40	M	21	Sérrère	CM	alive	GG	AA	GG
41	M	24	Diola	CM	alive	GG	AA	GG
42	M	24	Wolof	CM	dead	GG	AA	GG
43	F	61	Diola	CM	alive	GG	AA	GC
44	M	17	Peulh	CM	alive	GG	AA	GC
45	M	41	Peulh	CM	alive	GG	AA	GG
46	F	45	Wolof	CM	alive	GG	AA	GC
47	F	34	Socé	CM	alive	GG	AA	GG
48	M	42	Wolof	CM	alive	GG	AA	GG
49	M	39	Wolof	CM	dead	GG	AA	GG
50	F	9	Cap-Vert	CM	dead	GG	AA	GC
51	M	17	Wolof	CM	alive	GG	AA	GG
52	M	28	Wolof	CM	dead	GG	AA	GG
53	M	23	Wolof	CM	alive	GG	AA	GG
54	F	56	Soninké	CM	dead	GG	AA	GG
55	F	65	Sérrère	CM	alive	GG	AA	GG
56	M	41	Wolof	CM	alive	GG	AA	CC
57	M	72	Wolof	CM	dead	GG	AA	GC
58	M	23	Sérrère	CM	alive	GG	AA	GG
59	F	20	Française	CM	alive	GG	AA	GC
60	F	63	Wolof	CM	dead	GG	AA	GC
61	M	5	Peulh	CM	dead	GG	AA	GG
62	M	4	Peulh	CM	alive	GG	AA	GG
63	F	1	Peulh	CM	alive	GG	TT	GG
64	M	35	Sèrrère	CM	alive	GG	AA	GC
65	M	2	Soninké	CM	alive	GG	AA	GG
66	M	12	Peulh	CM	alive	GG	AA	GG
67	F	1.5	Peulh	CM	alive	GG	AA	NA
68	F	1	Peulh	CM	alive	GG	AT	GG
69	F	13	Bambara	CM	alive	GG	AA	GC
70	F	35	Peulh	CM	alive	GG	AA	GG
71	M	4	Bambara	CM	alive	GG	AA	GG
72	F	4	Peulh	CM	alive	GG	AA	GG
73	F	4	Wolof	CM	alive	GG	AA	GG
74	F	9	Bambara	CM	alive	GG	AA	GC
75	F	10	Peulh	CM	alive	GG	AA	GG
76	M	4	Soninké	CM	alive	GG	AA	CC
77	F	1.75	Bambara	CM	alive	GG	AA	GC
78	M	17	Wolof	CM	alive	GG	AA	GG
79	F	10	Peulh	CM	alive	GG	AA	GG
80	M	13	Peulh	CM	alive	GG	AA	GG
81	M	2	Peulh	CM	alive	GG	AA	GG
82	M	1	Peulh	CM	alive	GG	AA	GG
83	M	7	Mandingue	CM	alive	GG	AA	GG
84	M	8	Peulh	CM	alive	GG	AA	GG
85	F	6	Mandingue	CM	alive	GG	AA	GG
86	M	75	Peulh	NCM	alive	GG	AA	GC
87	M	43	Wolof	NCM	alive	GG	AA	GG
88	M	35	Peulh	NCM	alive	GG	AA	GG
89	F	21	Diola	NCM	alive	GG	AA	GG
90	M	30	Peulh	NCM	alive	GG	AA	GG
91	M	33	Wolof	NCM	alive	GG	AA	GC
92	F	87	Wolof	NCM	dead	GG	AA	GG
93	M	10	Peulh	NCM	alive	GG	AA	GC
94	M	1.25	Bassari	NCM	alive	GG	AA	GG
95	M	7	Bambara	NCM	alive	GG	AA	GC
96	M	2.5	Peulh	NCM	alive	GG	AA	GG
97	M	9	Peulh	NCM	alive	GG	AA	GC
98	F	43	Peulh	NCM	alive	GG	AA	GG
99	M	7	Wolof	NCM	alive	GG	AA	GG
100	M	2	Bambara	NCM	alive	GG	AA	GC
101	M	3	Socé	NCM	alive	GG	AA	GG
102	M	3.16	Peulh	NCM	alive	GG	AA	GG
103	F	7	Peulh	NCM	alive	GG	AA	GG
104	F	40	Peulh	NCM	alive	GG	AA	GC
105	F	0.014	Peulh	NCM	alive	GG	AA	GG
106	F	8	Peulh	NCM	alive	GG	AA	GG
107	M	14	Bambara	NCM	alive	GA	AA	GG
108	F	2	Diola	NCM	alive	GG	AA	GG
109	M	8	Soninké	NCM	alive	GG	AA	GC
110	F	2	Diola	NCM	alive	GG	AA	GG
111	M	11	Peulh	NCM	alive	GA	AT	GG
112	F	8	Peulh	NCM	alive	GG	AA	GC
113	M	20	Peulh	MM	alive	GG	AT	GG
114	M	2	Wolof	MM	alive	GG	AA	GG
115	M	2	Wolof	MM	alive	GG	AA	GG
116	F	44	Wolof	MM	alive	GG	AA	GC
117	M	19	Sérrère	MM	alive	GG	AA	GC
118	F	36	Peulh	MM	alive	GG	AA	GG
119	F	56	Sérrère	MM	alive	GG	AA	GG
120	F	36	Peulh	MM	alive	GG	AA	GC
121	F	35	Wolof	MM	alive	GG	AA	GG
122	M	23	Wolof	MM	alive	GG	AA	GG
123	M	34	Sérrère	MM	alive	GG	AA	GG
124	M	28	Wolof	MM	alive	NA	NA	GG
125	F	12	Wolof	MM	alive	GG	AA	GG
126	F	18	Wolof	MM	alive	GG	AA	GC
127	M	34	Soninké	MM	alive	GG	AA	GG
128	M	23	Wolof	MM	alive	GG	AA	CC
129	M	13	Peulh	MM	alive	GG	AA	NA
130	M	32	Peulh	MM	alive	GG	AA	GG
131	F	25	Wolof	MM	alive	GG	AA	GC
132	M	24	Bambara	MM	alive	GG	AA	CC
133	F	43	Peulh	MM	alive	GG	AA	GG
134	M	51	Wolof	MM	alive	GG	AA	GC
135	F	19	Bambara	MM	alive	GG	AA	GG
136	M	14	Wolof	MM	alive	GG	AA	GG
137	M	52	Diola	MM	alive	GG	AA	GC
138	M	31	Sérrère	MM	alive	GG	AA	GG
139	M	31	Sérrère	MM	alive	GG	AA	GG
140	F	16	Sérrère	MM	alive	GG	AT	GC
141	M	72	Wolof	MM	alive	GG	AA	GG
142	F	53	Peulh	MM	alive	GG	AA	GG
143	M	27	Peulh	MM	alive	GG	AA	GC
144	M	16	Sérrère	MM	alive	GG	AA	GG
145	M	74	Wolof	MM	alive	GG	AA	GG
146	F	23	Wolof	MM	alive	GG	AA	GG
147	M	33	Diola	MM	alive	GA	AA	GG
148	F	26	Sérrère	MM	alive	GG	AA	GC
149	F	5	Wolof	MM	alive	GG	AA	GC
150	M	18	Wolof	MM	alive	GG	AA	GG
151	M	18	Peulh	MM	alive	GG	AA	GG
152	M	NA	Peulh	MM	alive	GG	AA	GC
153	M	33	Peulh	MM	alive	GG	AA	GC
154	F	62	Wolof	MM	alive	GG	AA	GG
155	M	29	Sérère	MM	alive	GG	AA	CC
156	F	37	Soninke	MM	alive	GG	AA	GC
157	F	38	Soninké	MM	alive	GG	AA	GG
158	M	1	Peulh	MM	alive	GG	AT	GC
159	M	68	Peulh	MM	alive	GG	AA	GC
160	F	6	Peulh	MM	alive	GG	AA	GC
161	F	12	Peulh	MM	alive	GG	AA	GG
162	F	0.008	Peulh	MM	alive	GG	AA	GG
163	F	0.005	Peulh	MM	alive	GG	AA	GG
164	F	58	Bambara	MM	alive	GG	AA	GG
165	F	0.025	Bambara	MM	alive	GG	AA	GG
166	F	0.016	Peulh	MM	alive	GG	AA	GG
167	F	25	Peulh	MM	alive	GG	AA	GG
168	M	57	Peulh	MM	alive	GG	AA	GC
169	M	40	Peulh	MM	alive	GG	AA	GG
170	F	53	Peulh	MM	alive	GG	AT	GG
171	M	8	Peulh	MM	alive	GG	AA	GG
172	F	10	Peulh	MM	alive	GG	AA	GG
173	M	65	Soninké	MM	alive	GG	AA	GG
174	M	23	Bambara	MM	alive	GG	AA	GG
175	F	3	Peulh	MM	alive	GG	AA	GG
176	M	84	Soninké	MM	alive	GG	AA	GC
177	F	4	Peulh	MM	alive	GG	AA	GG
178	M	79	Peulh	MM	alive	GG	AA	GC
179	M	14	Peulh	MM	alive	GG	AA	NA
180	F	28	Socé	MM	alive	GG	AA	GG
181	M	57	Peulh	MM	alive	GG	AA	GC
182	F	38	Socé	MM	alive	GG	AA	GC
183	F	10	Soninké	MM	alive	GG	AA	GC
184	M	2.5	Wolof	MM	alive	GG	AA	GG
185	F	23	Soninké	MM	alive	GG	AA	GC
186	M	45	Wolof	MM	alive	GG	AA	GG
187	M	32	Peulh	MM	alive	GG	AT	GG
188	M	2	Peulh	MM	alive	GG	AA	GG
